# Supplementary material for: An automated flow platform for accurate determination of gas–liquid–solid reaction kinetics
Source: Royal Society of Chemistry journal article supplement (doi:10.1039/d0re00191k), 2020-01-01
Supplement: d0re00191k1.pdf [file d0re00191k1.pdf]

## Electronic Supplementary Information

### **An automated flow platform for accurate determination of gas-liquid-solid reaction kinetics**

Xiaonan Duan,<sup>a</sup> Jiacheng Tu,<sup>a</sup> Andrew R. Teixeira,<sup>b</sup> Le Sang,<sup>a</sup> Jisong Zhang\*,<sup>a</sup> and Klavs F. Jensen\*<sup>b</sup>

<sup>a</sup> The State Key Laboratory of Chemical Engineering, Department of Chemical Engineering, Tsinghua University, Beijing 100084, China.

<sup>b</sup> Department of Chemical Engineering, Massachusetts Institute of Technology, Cambridge, MA 02139, United States.

## Table of Contents

1. Standard curve of  $\alpha$ -methylstyrene and nitrobenzene
2. UV-vis spectra of starting materials and products
3. Calculation of internal diffusion
4. Determination of residence time under flow rate ramping
5. Raw data of reaction kinetics at varied temperatures
6. Linear fitting results of reaction rate constants for  $\alpha$ -methylstyrene and nitrobenzene
7. References

### 1. Standard curve of $\alpha$ -methylstyrene and nitrobenzene

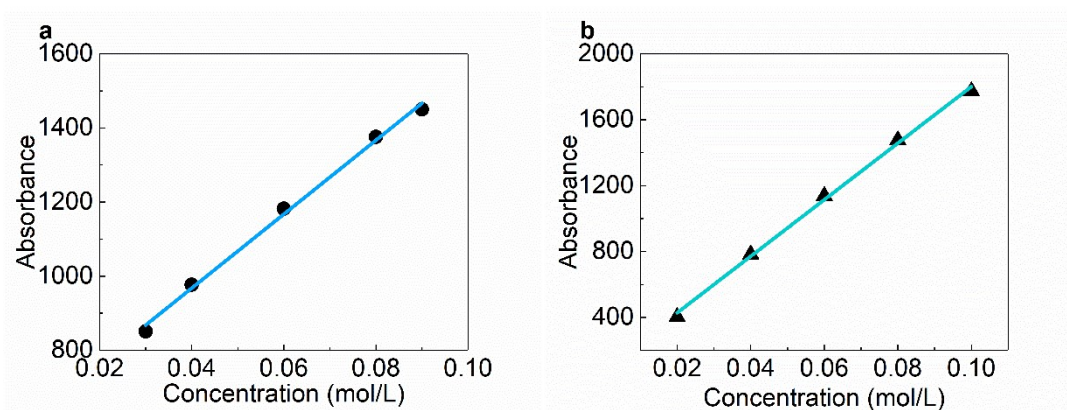

**Fig S1.** Standard curve of (a)  $\alpha$ -methylstyrene and (b) nitrobenzene. Reaction conditions: Temperature: 26 °C, gas pressure: 0.1 MPa; (b) Temperature: 31 °C, gas pressure: 0.1 MPa.

**Table S1.** Standard curve fitting results of  $\alpha$ -methylstyrene and nitrobenzene.

| Substate                | Curve fitting equation | R-square |
|-------------------------|------------------------|----------|
| $\alpha$ -methylstyrene | $y=9980.8x+568.35$     | 0.9963   |
| nitrobenzene            | $y=17164x+84.28$       | 0.998    |

### 2. UV-vis spectra of reactants and products

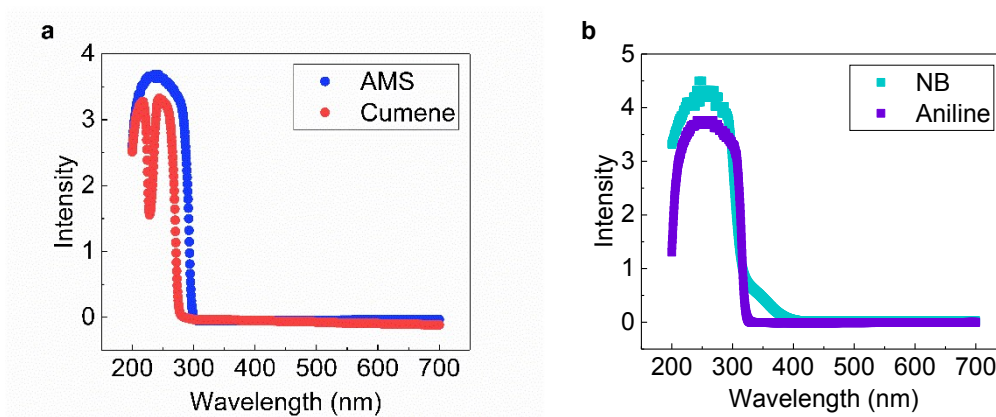

**Fig S2.** UV-vis spectra of (a) AMS, Cumene and (b) NB, aniline. Operation conditions: (a) Mass fraction: 1wt%; (b) Mass fraction: 0.015wt% (NB), 0.012wt% (Aniline); solvent: methanol.

### 3. Calculation of internal diffusion

In order to determine the effect of internal mass transfer, Thiele modulus was calculated by using equation (S1, S2, S3) and efficiency factors were obtained through the equation (S4):

$$D_m = 7.4 \times 10^{-8} \left[ \frac{(\varphi M_2)^{0.5} T}{\mu_1 V_1^{0.6}} \right] \#(S1)$$

$$D_{eff} = D_m \frac{\varepsilon}{\text{tortuosity}} \#(S2)$$

$$\phi = L \sqrt{\frac{k'''}{D_{eff}}} \#(S3)$$

$$\eta = \frac{3}{\phi} \left( \frac{1}{\tanh \phi} - \frac{1}{\phi} \right) \#(S4)$$

The values supporting this calculation are summarized in Table S2 and Table S3.

**Table S2** Values of symbols in internal diffusion of  $\alpha$ -methylstyrene.

| Symbols       | Significance                                                   | Value                                 |
|---------------|----------------------------------------------------------------|---------------------------------------|
| $\varphi$     | “Association parameter” for the solvent                        | 1.0 [1]                               |
| $M_2$         | Molecular weight of solvent (methanol)                         | 32.04 g/mol                           |
| $T$           | Temperature                                                    | 299.15 K                              |
| $\mu_1$       | Viscosity of solvent (methanol)                                | 0.94 mPa·s[2]                         |
| $V_1$         | Molar volume of solute at its normal boiling point             | 14.3 for $H_2$ [3]<br>76.5 for AMS[3] |
| $\varepsilon$ | <i>Porosity</i>                                                | 0.38[1]                               |
|               | <i>Tortuosity</i>                                              | 2.7[1]                                |
| $L$           | Characteristic length of catalyst particles (L=R/3 for sphere) | 0.16 mm                               |
| $k'''$        | Apparent reaction rate constant                                | 0.7953 min <sup>-1</sup>              |
| $D_m(H_2)$    | Molecular diffusion coefficient of $H_2$                       | $4.6 \times 10^{-9}$ m/s              |

|                |                                          |                           |
|----------------|------------------------------------------|---------------------------|
| $D_m(AMS)$     | Molecular diffusion coefficient of $AMS$ | $1.2 \times 10^{-9} m/s$  |
| $D_{eff}(H_2)$ | Effective diffusion coefficient of $H_2$ | $6.5 \times 10^{-10} m/s$ |
| $D_{eff}(AMS)$ | Effective diffusion coefficient of $AMS$ | $1.7 \times 10^{-10} m/s$ |
| $\phi(H_2)$    | Thiele modulus of $H_2$                  | 0.295                     |
| $\phi(AMS)$    | Thiele modulus of $AMS$                  | 0.578                     |
| $\eta(H_2)$    | Efficiency factor of $H_2$               | 0.994                     |
| $\eta(AMS)$    | Efficiency factor of $AMS$               | 0.978                     |

**Table S3** Values of symbols in internal diffusion of nitrobenzene

| Symbols        | Meaning                                                        | Value                                                          |
|----------------|----------------------------------------------------------------|----------------------------------------------------------------|
| $\varphi$      | “Association parameter” for the solvent                        | 1.0 <sup>[1]</sup>                                             |
| $M_2$          | Molecular weight of solvent (methanol)                         | 32.04 g/mol                                                    |
| $T$            | Temperature                                                    | 304.15 K                                                       |
| $\mu_1$        | Viscosity of solvent (methanol)                                | 0.94 mPa·s <sup>[2]</sup>                                      |
| $V_1$          | Molar volume of solute at its normal boiling point             | 14.3 for $H_2$ <sup>[3]</sup><br>101.2 for $NB$ <sup>[3]</sup> |
| $\varepsilon$  | <i>Porosity</i>                                                | 0.38 <sup>[1]</sup>                                            |
|                | <i>Tortuosity</i>                                              | 2.7 <sup>[1]</sup>                                             |
| $L$            | Characteristic length of catalyst particles (L=R/3 for sphere) | 0.16 mm                                                        |
| $k'''$         | Apparent reaction rate constant                                | 2.3737 L·mol <sup>-1</sup> ·min <sup>-1</sup>                  |
| $D_m(H_2)$     | Molecular diffusion coefficient of $H_2$                       | $1.17 \times 10^{-9} m/s$                                      |
| $D_m(NB)$      | Molecular diffusion coefficient of $NB$                        | $4.62 \times 10^{-9} m/s$                                      |
| $D_{eff}(H_2)$ | Effective diffusion coefficient of $H_2$                       | $6.50 \times 10^{-10} m^2/s$                                   |
| $D_{eff}(NB)$  | Effective diffusion coefficient of $NB$                        | $2.01 \times 10^{-10} m^2/s$                                   |
| $\phi(H_2)$    | Thiele modulus of $H_2$                                        | 0.0328                                                         |
| $\phi(NB)$     | Thiele modulus of $NB$                                         | 0.0590                                                         |
| $\eta(H_2)$    | Efficiency factor of $H_2$                                     | 0.999                                                          |
| $\eta(NB)$     | Efficiency factor of $NB$                                      | 0.999                                                          |

#### 4. Determination of residence time under flow rate ramping

The residence time,  $\tau$  and a fluid element entering and exiting the reactor at time  $t_i$  and  $t_f$ , respectively. Time for the beginning of ramping is defined as 0 and time for the end of ramping is  $t_A$  and time reaching the reactor outlet correspond to  $t_A$  is  $t_{f,A}$ .

For  $t_f < 0 \text{ min}$   $t_i < 0 \text{ min}$ , saturated liquid flows through reactor with volume of  $V_r$  where bed porosity is  $\varepsilon$  at initial flow rate,  $Q_0$ .

$$\tau = \frac{\varepsilon V_r}{Q_0} \quad \#(S5)$$

For  $t_f > 0 \text{ min}$   $t_i < 0 \text{ min}$ , integrating for the fluid element residence time as it travels the volume  $V_d$  between the end of reaction zone and the ultraviolet detector, and  $t_m$  is the time measurement occurs after fluid has flowed a volume  $V_d$  from the reactor outlet:

$$V_d = \int_{t_f}^{t_m} (Q_0 + at) dt \quad \#(S6)$$

From  $t_i$  to 0 min, saturated liquid flows through reactor at initial rate,  $Q_0$ . From 0 min to  $t_f$ , flow rate decreases constantly as  $Q_0 + at$ . Integrating for the fluid element residence time as it travels through the reactor volume:

$$\varepsilon V_r = \int_{t_i}^0 Q_0 dt + \int_0^{t_f} (Q_0 + at) dt \quad \#(S7)$$

Solving two equations above,  $t_f$ ,  $t_i$  and  $\tau$  could be expressed as follows:

$$t_f = \frac{Q_0 - \sqrt{Q_0^2 + 2a\left(\frac{a}{2}t_m^2 + Q_0t_m - V_d\right)}}{-a} \quad \#(S8)$$

$$t_i = \frac{Q_0t_f + \frac{a}{2}t_f^2 - \varepsilon V_r}{Q_0} \quad \#(S9)$$

$$\tau = t_f - t_i \quad \#(S10)$$

For  $t_m < t_A$   $t_f > 0 \text{ min}$   $t_i > 0 \text{ min}$ , liquid flow rate flowing through reactor and volume between reaction zone and ultraviolet detector are both  $Q_0 + at$ . Two equations are obtained when the fluid element travels through  $V_r$  and  $V_d$ .

$$V_d = \int_{t_f}^{t_m} (Q_0 + at) dt \quad \#(S11)$$

$$\varepsilon V_r = \int_{t_i}^{t_f} (Q_0 + at) dt \quad \#(S12)$$

Solving equations above,  $t_f$ ,  $t_i$  and  $\tau$  are obtained as:

$$t_f = \frac{Q_0 - \sqrt{Q_0^2 + 2a\left(\frac{a}{2}t_m^2 + Q_0t_m - V_d\right)}}{-a} \quad \#(S13)$$

$$t_i = \frac{Q_0 - \sqrt{Q_0^2 + 2a\left(\frac{a}{2}t_f^2 + Q_0t_f - \varepsilon V_r\right)}}{-a} \quad \#(S14)$$

$$\tau = t_f - t_i \quad \#(S15)$$

For  $t_m > t_A$   $t_f > 0 \text{ min}$   $t_i > 0 \text{ min}$ , from  $t_f$  to  $t_A$ , flow rate flowing through  $V_d$  is  $Q_0 + at$  from  $t_A$  to  $t_m$ , and the flow rate is constant as the final ramping flow rate,  $Q_A$ .

$$V_d = \int_{t_f}^{t_A} (Q_0 + at)dt + \int_{t_A}^{t_m} Q_A dt \#(S16)$$

From  $t_i$  to  $t_{f,A}$ , liquid flow rate flowing through  $V_r$  is  $Q_0 + at$ . From  $t_{f,A}$  to  $t_f$ , flow rate is constant as the final ramping flow rate,  $Q_A$ .

$$\varepsilon V_r = \int_{t_i}^{t_{f,A}} (Q_0 + at)dt + \int_{t_{f,A}}^{t_f} Q_A dt \#(S17)$$

Solving equation S16, S17,  $t_f$ ,  $t_i$  and  $\tau$  are obtained as:

$$t_f = \frac{Q_0 - \sqrt{Q_0^2 + 2a\left(Q_0 t_A + \frac{a}{2} t_A^2 + Q_A t_m - Q_A t_A - V_d\right)}}{-a} \#(S18)$$

$$t_i = \frac{Q_0 - \sqrt{Q_0^2 + 2a\left(Q_0 t_{f,A} + \frac{a}{2} t_{f,A}^2 + Q_A t_f - Q_A t_{f,A} - \varepsilon V_r\right)}}{-a} \#(S19)$$

$$\tau = t_f - t_i \#(S20)$$

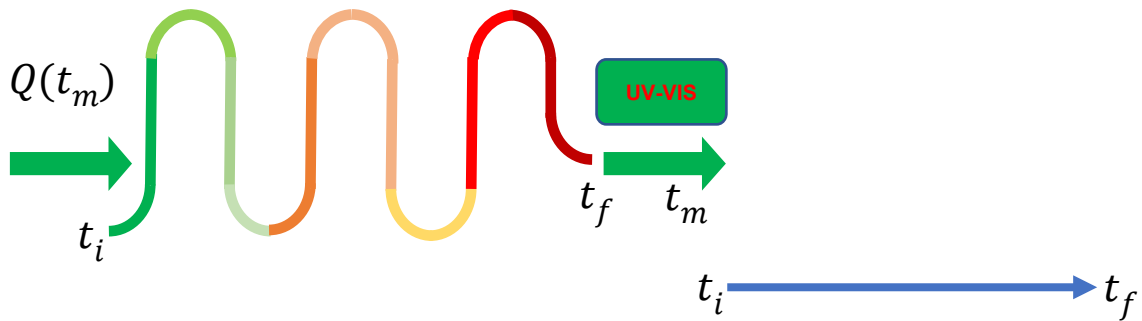

**Fig.S3** Representation of reaction in a low-dispersion flow reactor with ramping method. Color illustrates extent of conversion from low (green) to high (red).

## 5. Raw data of reaction kinetics at varied temperatures

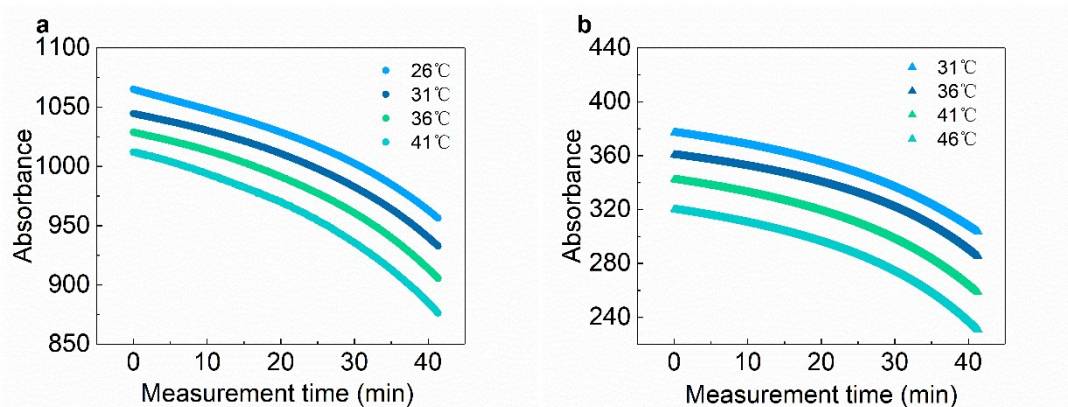

**Fig.S4** Absorbances of (a)  $\alpha$ -methylstyrene and (b) nitrobenzene at different measurement times and temperatures. Reaction conditions: (a)  $\alpha$ -Methylstyrene concentration: 0.06 mol/L, gas pressure: 1.0 MPa; (b) nitrobenzene concentration: 0.02 mol/L, gas pressure: 1.3 MPa; flow rate ramping: 0.02 mL/min/min, catalyst loading: 5 wt%.

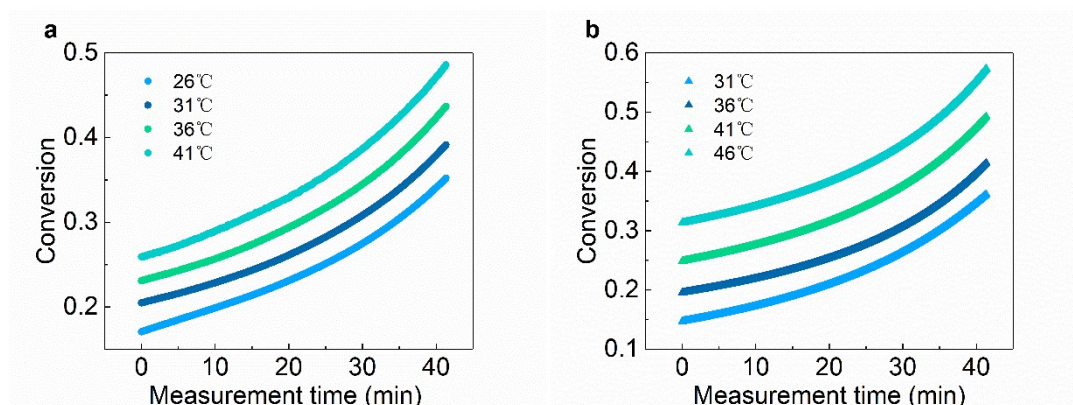

**Fig.S5** Conversion of (a)  $\alpha$ -methylstyrene and (b) nitrobenzene at different measurement times and temperatures. Reaction conditions: (a)  $\alpha$ -Methylstyrene concentration: 0.06 mol/L, gas pressure: 1.0 MPa; (b) nitrobenzene concentration: 0.02 mol/L, gas pressure: 1.3 MPa; flow rate ramping: 0.02 mL/min/min, catalyst loading: 5 wt%.

## 6. Linear fitting results of reaction rate constants for $\alpha$ -methylstyrene and nitrobenzene

**Table S4** Linear fitting results of reaction rate constants for  $\alpha$ -methylstyrene

| Temperature/ $^{\circ}$ C | Curve fitting equation | R-square |
|---------------------------|------------------------|----------|
| 26                        | $y=24.403x$            | 0.9993   |
| 31                        | $y=28.268x$            | 0.999    |
| 36                        | $y=32.949x$            | 0.9997   |
| 41                        | $y=38.920x$            | 0.9998   |

**Table S5** Linear fitting results of reaction rate constants for nitrobenzene

| Temperature/ $^{\circ}$ C | Curve fitting equation | R-square |
|---------------------------|------------------------|----------|
| 31                        | $y=15.809x$            | 0.9995   |
| 36                        | $y=19.340x$            | 0.9997   |
| 41                        | $y=25.595x$            | 0.9996   |
| 46                        | $y=33.545x$            | 0.9992   |

## 7. References

1. C. Yang, A. R. Teixeira, Y. Shi, S. C. Born, H. Lin, Y. L. Song, B. Martin, B. Schenkel, M. P. Lachegurabi and K. F. Jensen, *Green chemistry*, 2018, **20**, 886-893.
2. R. A. Lewis, *Hawley's condensed chemical dictionary*, John Wiley & Sons, 2016.

3. N. T. Program, *National Toxicology Program Chemical Repository Database*. Research Triangle Park, North Carolina: NTP via [httn.canieochemicals.noaa.gov/chemical/20568](http://httn.canieochemicals.noaa.gov/chemical/20568).
